# Supplementary material for: Using Machine Learning to Unravel the Value of Radiographic Features for the Classification of Bone Tumors
Source: Hindawi journal article supplement (doi:10.1155/2021/8811056), 2021-01-01
Supplement: f1 [file 8811056.f1.pdf]

## Supplement Section:

### The locations represented by each letter

| Value | Location       | Value | Location         |
|-------|----------------|-------|------------------|
| a     | Upper tibia    | l     | Middle ulna      |
| b     | Inferior femur | m     | Distal radius    |
| c     | Upper humerus  | n     | Lumbar vertebrae |
| d     | Middle humerus | o     | Distal ulna      |
| e     | Sacrum         | p     | Hand             |
| f     | Distal humerus | q     | Proximal ulna    |
| g     | Foot           | r     | Middle tibia     |
| h     | Pelvis         | s     | Scapula          |
| i     | Middle femur   | t     | Proximal fibula  |
| j     | Distal tibia   | u     | clavicle         |
| k     | Proximal femur | v     | proximal radius  |

### The type and number of bone tumors in the tertiary model's test set

| Benign bone tumor (123)         | Intermediate bone tumor (51)       | Malignant bone tumor (65)              |
|---------------------------------|------------------------------------|----------------------------------------|
| Non-ossifying fibroma (11)      | Aneurysmal bone cyst (13)          | Osteosarcoma (34)                      |
| Osteochondroma (49)             | Giant cell tumor of bone (25)      | Spindle cell malignancies (2)          |
| Bone cysts (10)                 | Osteblastoma (4)                   | Ewing's sarcoma (3)                    |
| Osteofibrous dysplasia (17)     | Eosinophilic granuloma of bone (9) | Malignant giant cell tumor of bone (1) |
| Fibroxanthoma of bone (1)       |                                    | Chordoma (3)                           |
| osteoidosteoma (14)             |                                    | Plasmacytoma (2)                       |
| Benign fibrous histiocytoma (3) |                                    | Lymphoma of bone (1)                   |
| Endogenous chondroma (15)       |                                    | Chondrosarcoma (5)                     |
| Neurilemmoma of bone (1)        |                                    | Bone metastases (14)                   |
| Hemangioma (2)                  |                                    |                                        |
